# Supplementary material for: The ciliary Frizzled-like receptor Tmem67 regulates canonical Wnt/β-catenin signalling in the developing cerebellum via Hoxb5
Source: PubMed Central journal article supplement (PMC6445493; doi:10.1038/s41598-019-41940-5), 2019-04-01

# The ciliary Frizzled-like receptor *Tmem67* regulates canonical Wnt/ $\beta$ -catenin signalling in the developing cerebellum via *Hoxb5*

Zakia A. Abdelhamed, Dina I. Abdelmottaleb, Mohammed E. El-Asrag, Subaashini Natarajan, Gabrielle Wheway, Chris F. Inglehearn, Carmel Toomes, Colin A. Johnson

## SUPPLEMENTARY INFORMATION

**Supplementary Figure S1. Gene expression profile and differential exon usage plots for the *Tmem67* gene.** RNA-seq data for wild-type *Tmem67*<sup>+/+</sup> and mutant *Tmem67*<sup>-/-</sup> post-natal cerebellum data-sets were analysed using DEXSeq (v 3.8). Expression and exon usage are shown for each exon or splice junction in the *Tmem67* gene (Ensembl gene ENSMUSG00000049488) from *Tmem67*<sup>+/+</sup> (blue traces) and *Tmem67*<sup>-/-</sup> (red traces) samples. Canonical Ensembl transcripts are shown beneath the main plotting panels, showing the location and organization of the corresponding numbered exons (E) in the gene. Genomic co-ordinates are indicated at the bottom. The predicted coding status of each transcript (protein coding, nonsense-mediated decay or retained intron) is also indicated. Differential expression (DE) and differential exon usage (DEU) was statistically significant ( $p_{\text{adj}} < 0.01$ ) for all exons, with the greatest DE change identified for exon 41 encoding the 3'UTR (highlighted in magenta).

# *Tmem67* (ENSMUSG00000049488)

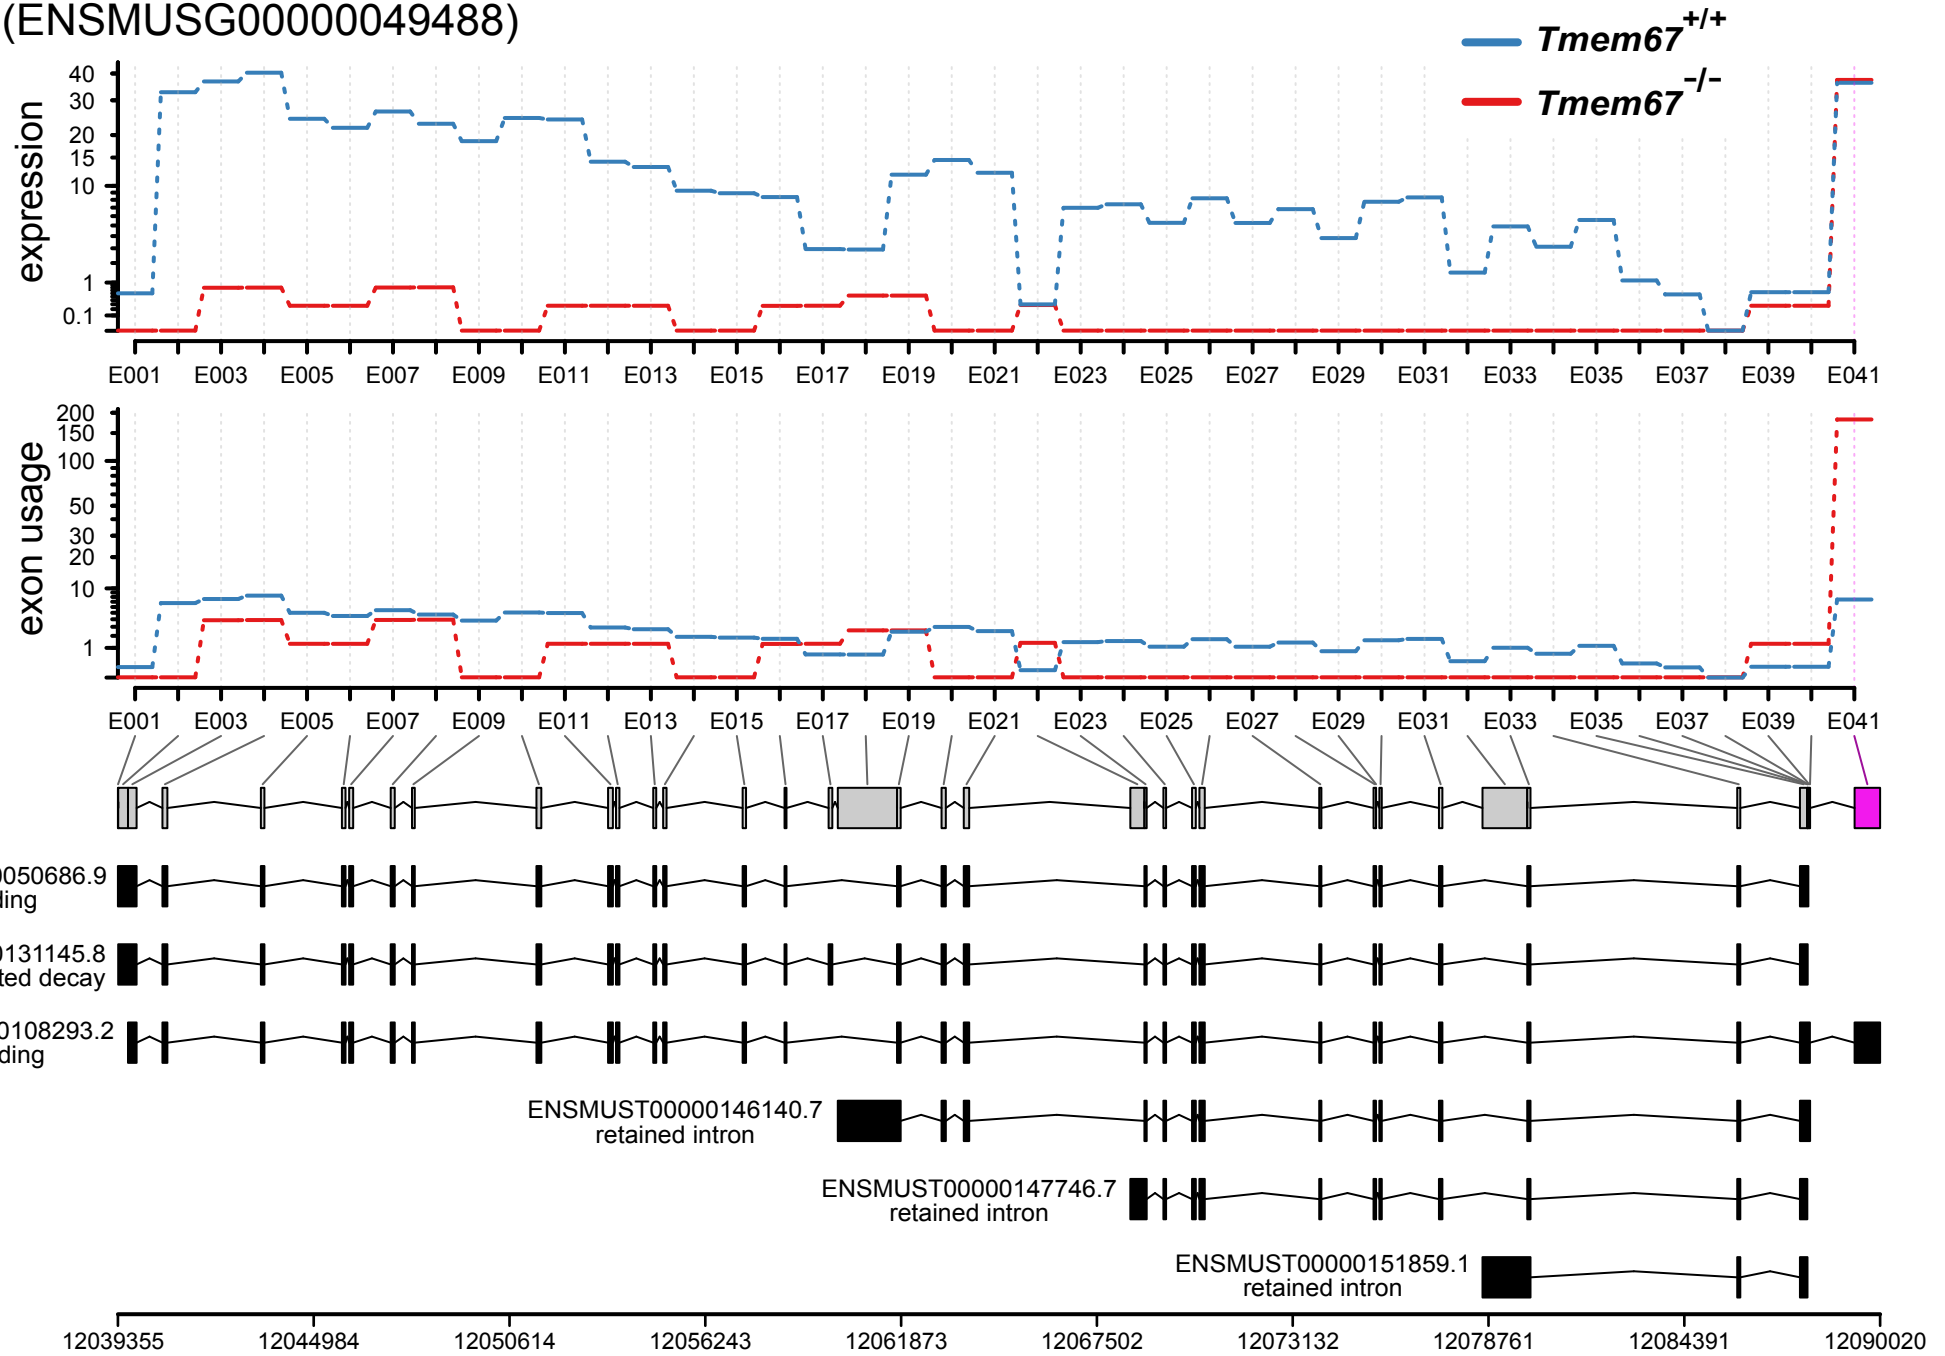

**Supplementary Table S1. DESeq2 output table for significant differentially expressed genes.** RNA-seq data for the wild-type *Tmem67*<sup>+/+</sup> and mutant *Tmem67*<sup>-/-</sup> post-natal cerebellum data-sets were aligned using STAR and were analysed using DESeq2. In total, 41 differentially expressed (DE) genes passed statistical cut-offs of false discovery rate (FDR)  $p < 0.05$  and absolute  $\log_2$  fold change (FC)  $\geq 1$ . Column headings are as follows: baseMean, the average of the normalized counts taken over all samples; log2FoldChange,  $\log_2$  fold change between *Tmem67*<sup>+/+</sup> and *Tmem67*<sup>-/-</sup> data-sets; lfcSE, standard error of the  $\log_2$  FoldChange estimate; stat, Wald statistic; pvalue, Wald test p-value; padj, Benjamini-Hochberg p-value adjusted for FDR. A positive  $\log_2$  fold-change indicates that gene expression is up-regulated in the *Tmem67*<sup>-/-</sup> mutant compared to the *Tmem67*<sup>+/+</sup> wild-type, whereas a negative  $\log_2$  fold-change indicates down-regulation.

| Gene Symbol     | ENSEMBL Gene IDs   | baseMean    | log2FoldChange | lfcSE       | stat         | pvalue      | padj        |
|-----------------|--------------------|-------------|----------------|-------------|--------------|-------------|-------------|
| <i>Actg2</i>    | ENSMUSG00000059430 | 234.8231968 | -1.529326491   | 0.315414687 | -4.848621685 | 1.24322E-06 | 0.001440091 |
| <i>Aqp4</i>     | ENSMUSG00000024411 | 4202.190448 | -1.065914248   | 0.235774735 | -4.520901051 | 6.1577E-06  | 0.00577416  |
| <i>Asb2</i>     | ENSMUSG00000021200 | 55.68427508 | -2.708290952   | 0.521846955 | -5.189818444 | 2.10499E-07 | 0.000318858 |
| <i>Atoh7</i>    | ENSMUSG00000036816 | 479.4961287 | -3.913345837   | 0.893244733 | -4.381045521 | 1.18111E-05 | 0.008614243 |
| <i>Atp2a1</i>   | ENSMUSG00000030730 | 207.3356058 | -5.707832431   | 1.273442549 | -4.482206468 | 7.38752E-06 | 0.006612504 |
| <i>Birc5</i>    | ENSMUSG00000017716 | 480.2349764 | 1.049033209    | 0.263283461 | 3.984425019  | 6.76437E-05 | 0.033300999 |
| <i>Bpifb9a</i>  | ENSMUSG00000067998 | 32.07626809 | 8.209207121    | 1.79955039  | 4.561810087  | 5.07145E-06 | 0.004993351 |
| <i>Btg1</i>     | ENSMUSG00000036478 | 2547.518108 | 0.754291969    | 0.187886187 | 4.014621729  | 5.95412E-05 | 0.030854881 |
| <i>C1ql1</i>    | ENSMUSG00000045532 | 438.3182765 | -0.954047577   | 0.230770315 | -4.13418675  | 3.56E-05    | 0.020041603 |
| <i>Carnmt1</i>  | ENSMUSG00000024726 | 712.1717847 | 2.213849266    | 0.378720786 | 5.845597456  | 5.04753E-09 | 1.24245E-05 |
| <i>Ccnb1</i>    | ENSMUSG00000041431 | 783.8076346 | 1.799242084    | 0.433986056 | 4.145852291  | 3.38552E-05 | 0.020041603 |
| <i>Cpne6</i>    | ENSMUSG00000022212 | 394.7545703 | -1.416058814   | 0.318413574 | -4.447231308 | 8.69842E-06 | 0.006696636 |
| <i>Cryab</i>    | ENSMUSG00000032060 | 243.9493838 | -2.042917525   | 0.502155696 | -4.068295035 | 4.73584E-05 | 0.025204905 |
| <i>Dpt</i>      | ENSMUSG00000026574 | 132.746289  | -2.010356229   | 0.465691003 | -4.31693165  | 1.58213E-05 | 0.011126903 |
| <i>ErbB3</i>    | ENSMUSG00000018166 | 70.1724678  | -2.355433048   | 0.569078316 | -4.139031449 | 3.48775E-05 | 0.020041603 |
| <i>Fam60a</i>   | ENSMUSG00000039985 | 560.409657  | 1.438369814    | 0.313834092 | 4.583217211  | 4.57876E-06 | 0.004745523 |
| <i>Gli1</i>     | ENSMUSG00000025407 | 216.9142807 | -3.360580954   | 0.704664748 | -4.769049346 | 1.85097E-06 | 0.002024965 |
| <i>Gm29650</i>  | ENSMUSG00000099876 | 41.83200333 | 8.592388005    | 1.643491154 | 5.228131581  | 1.71232E-07 | 0.000280991 |
| <i>Hoxa5</i>    | ENSMUSG00000038253 | 541.1539434 | 9.270560642    | 0.887218392 | 10.44901766  | 1.48051E-25 | 1.45771E-21 |
| <i>Hoxb4</i>    | ENSMUSG00000038692 | 861.717211  | 9.9596331      | 0.89557464  | 11.12094141  | 9.92195E-29 | 1.95383E-24 |
| <i>Hoxb5</i>    | ENSMUSG00000038700 | 833.8199632 | 11.48531619    | 1.380966325 | 8.316869124  | 9.03174E-17 | 5.92843E-13 |
| <i>Hoxd3</i>    | ENSMUSG00000079277 | 57.987746   | 9.063517562    | 1.732736605 | 5.230753213  | 1.68821E-07 | 0.000280991 |
| <i>Mpz</i>      | ENSMUSG00000056569 | 78.66426876 | -23.43263555   | 4.785588102 | -4.896500714 | 9.75583E-07 | 0.001200699 |
| <i>Ms4a7</i>    | ENSMUSG00000024672 | 1449.406341 | -1.107948178   | 0.249329151 | -4.443716961 | 8.84179E-06 | 0.006696636 |
| <i>mt-Atp8</i>  | ENSMUSG00000064356 | 10383.90832 | -0.937095054   | 0.21936786  | -4.271797391 | 1.94E-05    | 0.01272784  |
| <i>mt-Te</i>    | ENSMUSG00000064369 | 126.3974416 | -24.06295249   | 4.785270068 | -5.028546382 | 4.94212E-07 | 0.000648801 |
| <i>Odc1</i>     | ENSMUSG00000011179 | 3128.060057 | 1.041450773    | 0.233502678 | 4.460123469  | 8.19124E-06 | 0.006696636 |
| <i>Pax5</i>     | ENSMUSG00000014030 | 291.6473746 | -1.937064528   | 0.29390724  | -6.590734292 | 4.37657E-11 | 1.72367E-07 |
| <i>Pax7</i>     | ENSMUSG00000028736 | 124.8429082 | -2.145111601   | 0.48082438  | -4.461320371 | 8.14562E-06 | 0.006696636 |
| <i>Pdzk1ip1</i> | ENSMUSG00000028716 | 194.100041  | -5.020535814   | 0.951229588 | -5.277943283 | 1.30642E-07 | 0.000280991 |
| <i>Plec</i>     | ENSMUSG00000022565 | 2500.498594 | -1.025714376   | 0.239663366 | -4.279812946 | 1.87E-05    | 0.012701371 |
| <i>Ptch1</i>    | ENSMUSG00000021466 | 84.04040224 | -2.954381119   | 0.505385159 | -5.845801106 | 5.04136E-09 | 1.24245E-05 |
| <i>Pygm</i>     | ENSMUSG00000032648 | 332.2980605 | -1.888237667   | 0.471682465 | -4.003196656 | 6.24923E-05 | 0.031553811 |
| <i>Ren1</i>     | ENSMUSG00000070645 | 30.55767478 | -3.389350606   | 0.85797731  | -3.950396552 | 7.80218E-05 | 0.037473307 |
| <i>Slc18a3</i>  | ENSMUSG00000100241 | 246.6168674 | -1.335045799   | 0.318604442 | -4.190292488 | 2.78595E-05 | 0.017144046 |
| <i>Slc6a12</i>  | ENSMUSG00000030109 | 1009.704671 | -0.893853081   | 0.212687342 | -4.202662332 | 2.64E-05    | 0.016756872 |
| <i>Tbx1</i>     | ENSMUSG00000009097 | 27.15588889 | -3.967570536   | 0.972601037 | -4.079340229 | 4.51637E-05 | 0.024704542 |
| <i>Tcf24</i>    | ENSMUSG00000099032 | 91.01959095 | -3.546393846   | 0.553302151 | -6.409506703 | 1.45991E-10 | 4.79143E-07 |
| <i>Tmem67</i>   | ENSMUSG00000049488 | 130.5979608 | -24.12131759   | 4.785253201 | -5.040760976 | 4.63684E-07 | 0.000648801 |
| <i>Uty</i>      | ENSMUSG00000068457 | 250.1920761 | 9.742670022    | 1.411141753 | 6.904104426  | 5.05211E-12 | 2.48716E-08 |
| <i>Xist</i>     | ENSMUSG00000086503 | 11524.69877 | -8.519539891   | 1.625710795 | -5.240501518 | 1.60141E-07 | 0.000280991 |

**Supplementary Information File.** Full scans of gels and blots, with regions displayed in figures indicated by red frames.

**Figure 4c**

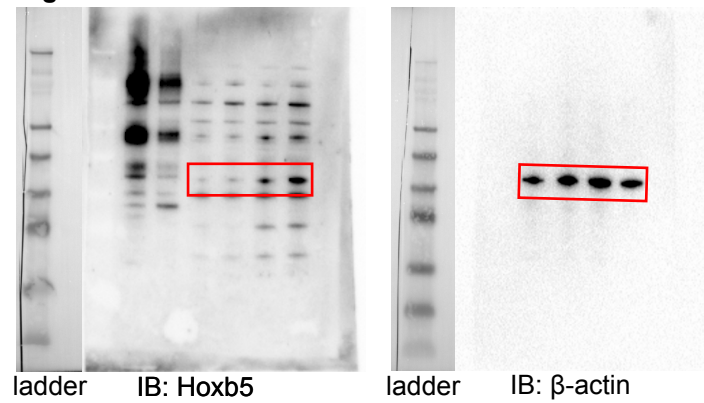

**Figure 6c**

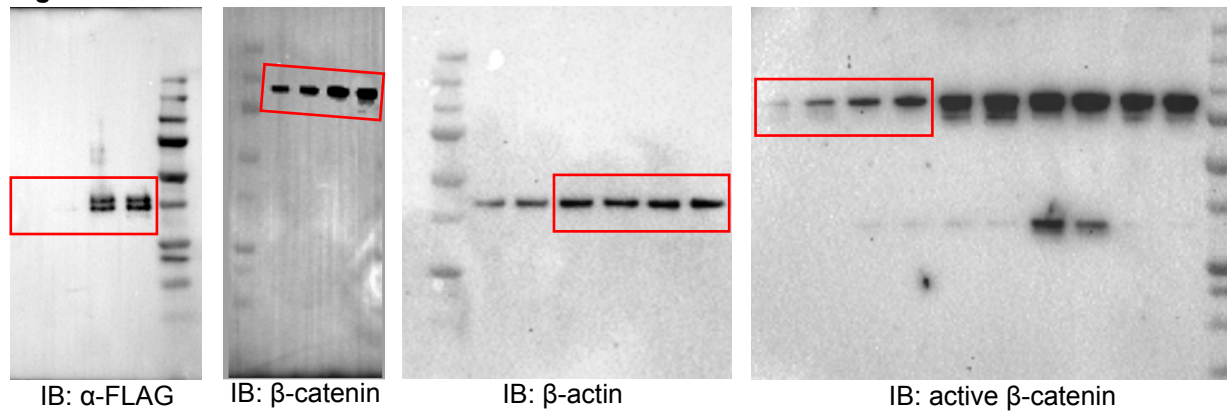

**Figure 7a**

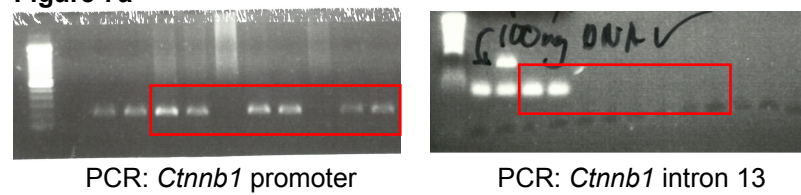

Supplement: 41598_2019_41940_MOESM1_ESM.pdf [file 41598_2019_41940_MOESM1_ESM.pdf]
